# Supplementary material
Source: PubMed Central journal article supplement (PMC4056827)

## Supporting Information

### *Advent of Imidazo[1,2-a]pyridine-3-carboxamides with Potent Multi- and Extended Drug Resistant Antituberculosis Activity*

Garrett C. Moraski,<sup>a</sup> Lowell D. Markley,<sup>a</sup> Philip A. Hipskind,<sup>b</sup> Helena Boshoff,<sup>c</sup> Sanghyun Cho,<sup>d</sup> Scott G. Franzblau,<sup>d</sup> and Marvin J. Miller<sup>\*a</sup>

<sup>a</sup>Department of Chemistry and Biochemistry, University of Notre Dame, Notre Dame, Indiana 46556, <sup>b</sup>Lilly Research Laboratories, Eli Lilly and Company, Indianapolis IN 46285,

<sup>c</sup>Tuberculosis Research Section, Laboratory of Clinical Infectious Diseases, National Institute of Allergy and Infectious Diseases, National Institutes of Health, Bethesda, Maryland 20892, <sup>d</sup>Institute for Tuberculosis Research, College of Pharmacy, University of Illinois at Chicago, 833 South Wood Street, Chicago, Illinois 60612

\*To whom correspondence should be addressed: mmiller1@nd.edu

### Contents of Supporting Information

|                                                                                                   |     |
|---------------------------------------------------------------------------------------------------|-----|
| Experimental Section Notes.....                                                                   | S2  |
| Experimental details for compounds <b>1</b> – <b>11</b> .....                                     | S3  |
| Description of TB (GAS, GAST, 7H12) assays.....                                                   | S9  |
| Description of LORA assay.....                                                                    | S10 |
| Description of VERO assay.....                                                                    | S10 |
| Spectrum of activity assay.....                                                                   | S11 |
| Description of microsomal assay for compounds <b>1</b> , <b>3</b> , <b>4</b> , and <b>6</b> ..... | S12 |
| Protein binding assay description for compounds <b>1</b> and <b>10</b> .....                      | S12 |

|                                                                                                                  |     |
|------------------------------------------------------------------------------------------------------------------|-----|
| <i>In vivo</i> PK information for compounds <b>1</b> , <b>3</b> , <b>4</b> , and <b>6</b> .....                  | S13 |
| Transcriptional profiling experiments of <i>M. tuberculosis</i> treated with compound <b>1</b> .....             | S17 |
| References.....                                                                                                  | S17 |
| <sup>1</sup> H NMR's and <sup>13</sup> C NMR's for compounds <b>1</b> , <b>3</b> , <b>4</b> , and <b>6</b> ..... | S18 |

## Experimental Section

All anhydrous solvents, reagent grade solvents for chromatography and starting materials were purchased from either Aldrich Chemical Co. (Milwaukee, WI) or Fisher Scientific (Suwanee, GA). Water was distilled and purified through a Milli-Q water system (Millipore Corp., Bedford, MA). General methods of purification of compounds involved the use of silica cartridges purchased from AnaLogix, Inc. (Burlington, WI; [www.ana-logix.com](http://www.ana-logix.com)) and/or recrystallization. The reactions were monitored by TLC on precoated Merck 60 F<sub>254</sub> silica gel plates and visualized using UV light (254 nm). All compounds were analyzed for purity by HPLC and characterized by <sup>1</sup>H and <sup>13</sup>C NMR using Varian 300MHz NMR and/or Varian 500 MHz NMR spectrometers. Chemical shifts are reported in ppm ( $\delta$ ) relative to the residual solvent peak in the corresponding spectra; chloroform  $\delta$  7.26 and  $\delta$  77.23, methanol  $\delta$  3.31 and  $\delta$  49.00 and coupling constants (*J*) are reported in hertz (Hz) (where, s = singlet, bs = broad singlet, d = doublet, dd = double doublet, bd = broad doublet, ddd = double doublet of doublet, t = triplet, tt – triple triplet, q = quartet, m = multiplet) and analyzed using MestReC NMR data processing. Mass spectra values are reported as *m/z*. Melting points were measured on a Thomas-Hoover capillary melting point apparatus and are uncorrected. The HPLC HRMS analyses were carried out on a Dionex RSLC (UPLC) System with a Bruker MicroOTOF-Q II, using a Dionex Acclaim RSLC 120 C<sub>18</sub>, 2.2  $\mu$ m, 120 Å, 2.1 x 100

mm column run at 40°C. Mobile phases: (A) Millipore purified water with 0.1% formic acid at a flow rate of 0.5 mL min<sup>-1</sup> and UV detection at 254 nm. (B) HPLC grade acetonitrile with 0.1% formic acid at a flow rate of 0.5 mL min<sup>-1</sup> and UV detection at 254 nm. A typical run time was 10 min with a linear gradient of 70% A to 30% B to start (time = 0 mins) and then 100% B at 6 min, 100% B at 8 min, 70% A to 30% B at 8.1 min and finally 70% A to 30% B at 10 min. All reactions were conducted under argon unless otherwise noted. Solvents were removed *in vacuo* on a rotary evaporator. The 2,6-dimethylimidazo[1,2-a]pyrimidine-3-carboxylic acid was purchased from PracticaChem LLC (<http://www.practicachem.com/>, item PrC001522). Abbreviations: DCM = dichloromethane; DMF = dimethylformamide; ACN = acetonitrile; EtOAc = ethyl acetate; HOAc = acetic acid; EDC = *N*-(3-Dimethylaminopropyl)-*N'*-ethylcarbodiimide hydrochloride. All compounds are >98% pure by HPLC analysis and MIC values reported are the average of three individual measurements. Additionally, all animal experiments were conducted in accordance with the animal care and use committee of Jubilant Biosciences Laboratories.

### **2,7-dimethylimidazo[1,2-*a*]pyridine-3-carboxylic acid**

2-Amino-4-picoline (10.0 g, 91.5 mmol) and ethyl-2-chloroacetoacetate (7.93 g, 45.8 mmol) were dissolved in 92 mL of 1,2-dimethoxyethane (DME) and heated for 36 h at reflux. The reaction mixture was filtered and (2-amino-4-picoline hydrochloride salt) solids were collected and washed with hexanes. The filtrate was concentrated *in vacuo* and the residue was dissolved in CH<sub>2</sub>Cl<sub>2</sub> and washed with 5% acetic acid solution (2x) and brine. The organic phase was collected, dried over sodium sulfate (Na<sub>2</sub>SO<sub>4</sub>), filtered and then concentrated *in vacuo*. Crude material obtained was purified by silica gel column

chromatography with a 20% ethyl acetate : CH<sub>2</sub>Cl<sub>2</sub> solvent system to give 7.8 g (78%) of ethyl 2,7-dimethylimidazo[1,2-a]pyridine-3-carboxylate as a tan solid. Mp 59 - 61°C; <sup>1</sup>H NMR (300 MHz, CDCl<sub>3</sub>) δ 9.14 (d, *J* = 7.1 Hz, 1H), 7.34 (s, 1H), 6.78 (dd, *J* = 7.1, 1.7 Hz, 1H), 4.40 (q, *J* = 7.1, 7.1, 7.1 Hz, 2H), 2.66 (s, 3H), 2.42 (s, 3H), 1.42 (t, *J* = 7.1, 7.1 Hz, 3H). HRMS (EI), M+1 calcd. for C<sub>12</sub>H<sub>15</sub>N<sub>2</sub>O<sub>2</sub>, 219.1155; found 219.1128. HPLC t<sub>R</sub> = 1.4 min.

Ethyl 2,7-dimethylimidazo[1,2-a]pyridine-3-carboxylate (6.64 g, 30.4 g) was dissolved in of 75 mL ethanol (95:5) and 61 mL of 1 N LiOH solution was added (61 mmol). The reaction was stirred at reflux for 36 h. Once complete, the reaction was concentrated *in vacuo* to near dryness and the pH was adjusted to 3 with slow addition of 4 N HCl while cooling in an ice bath. The resulting solids were collected by filtration and were dried under vacuum overnight to give 3.86 g (67%) of 2,7-dimethylimidazo[1,2-a]pyridine-3-carboxylic acid as an off white solid. Mp 180 - 183°C; <sup>1</sup>H NMR (300 MHz, CD<sub>3</sub>OD) δ 9.52 (d, *J* = 7.1 Hz, 1H), 7.73 (td, *J* = 1.8, 0.9, 0.9 Hz, 1H), 7.48 (dd, *J* = 7.1, 1.3 Hz, 1H), 2.81 (s, 3H), 2.63 (s, 3H). HRMS (EI), M+1 calcd. for C<sub>10</sub>H<sub>11</sub>N<sub>2</sub>O<sub>2</sub>, 191.0815; found 191.0837. HPLC t<sub>R</sub> = 0.6 min.

#### ***N*-Benzyl-2,7-dimethylimidazo[1,2-a]pyridine-3-carboxamide (1)**

2,7-Dimethylimidazo[1,2-a]pyridine-3-carboxylic acid (50 mg, 0.25 mmol) and benzyl amine (33 μL, 0.3 mmol) were dissolved in 2 mL of acetonitrile (ACN) and treated with *N*-(3-dimethylaminopropyl)-*N'*-ethylcarbodiimide hydrochloride (EDC, 96 mg, 0.5 mmol) and 4-dimethylaminopyridine (DMAP, 92 mg, 0.75 mmol). The resulting solution was stirred for 12 h at room temperature. The reaction mixture was diluted with CH<sub>2</sub>Cl<sub>2</sub>, washed with 10% aqueous NaHCO<sub>3</sub> solution (2x), water, and 5% acetic acid solution (2x). The organic phase

was collected, dried over sodium sulfate ( $\text{Na}_2\text{SO}_4$ ), filtered and then concentrated *in vacuo*. Crude material obtained was purified by silica gel column chromatography with a 20% ethyl acetate :  $\text{CH}_2\text{Cl}_2$  solvent system to give 49 mg (70%) of **1** as a white solid. Mp 166 - 167°C;  $^1\text{H}$  NMR (500 MHz,  $\text{CDCl}_3$ )  $\delta$  9.30 (d,  $J = 7.1$  Hz, 1H), 7.39-7.28 (m, 5H), 7.25 (s, 1H), 6.75 (dd,  $J = 7.2, 1.8$  Hz, 1H), 6.05 (bs, 1H, NH), 4.69 (d,  $J = 5.7$  Hz, 2H), 2.65 (s, 3H), 2.41 (s, 3H).  $^{13}\text{C}$  NMR (126 MHz,  $\text{CDCl}_3$ )  $\delta$  161.73, 146.71, 145.56, 138.51, 138.46, 129.02, 127.79, 127.47, 115.89, 115.22, 115.02, 43.59, 21.52, 16.95. HRMS (EI), M+1 calcd. for  $\text{C}_{17}\text{H}_{18}\text{N}_3\text{O}$ , 280.1444; found 280.1480. HPLC  $t_{\text{R}} = 0.9$  min.

#### ***N*-(2-Methoxybenzyl)-2,7-dimethylimidazo[1,2-*a*]pyridine-3-carboxamide (2)**

This compound was prepared using a similar coupling procedure as described for the preparation of amide **1**. The product was obtained as a white solid. Mp 160 - 161°C;  $^1\text{H}$  NMR (300 MHz,  $\text{CDCl}_3$ )  $\delta$  9.30 (d,  $J = 7.1$  Hz, 1H), 7.39-7.26 (m, 3H), 7.00-6.89 (m, 2H), 6.74 (dd,  $J = 7.2, 1.8$  Hz, 1H), 6.05 (bs, 1H, NH), 4.67 (d,  $J = 5.7$  Hz, 2H), 3.92 (s, 3H), 2.65 (s, 3H), 2.41 (s, 3H).  $^{13}\text{C}$  NMR (126 MHz,  $\text{CDCl}_3$ )  $\delta$  161.40, 157.77, 149.88, 146.52, 145.22, 138.19, 130.06, 129.20, 127.49, 126.46, 121.02, 115.71, 115.12, 110.49, 55.45, 39.83, 21.49, 16.60. HRMS (EI), M+1 calcd. for  $\text{C}_{18}\text{H}_{20}\text{N}_3\text{O}_2$ , 310.1550; found 310.1563. HPLC  $t_{\text{R}} = 1.6$  min.

#### ***N*-(3-Methoxybenzyl)-2,7-dimethylimidazo[1,2-*a*]pyridine-3-carboxamide (3)**

This compound was prepared using a similar coupling procedure as described for the preparation of amide **1** to give the product as a white solid. Mp 174 - 175°C;  $^1\text{H}$  NMR (300 MHz,  $\text{CDCl}_3$ )  $\delta$  9.31 (d,  $J = 7.1$  Hz, 1H), 7.33-7.26 (m, 2H), 6.99-6.81 (m, 3H), 6.75 (dd,  $J =$

7.2, 1.8 Hz, 1H), 6.06 (bs, 1H, NH), 4.67 (d,  $J = 5.7$  Hz, 2H), 3.81 (s, 3H), 2.66 (s, 3H), 2.42 (s, 3H).  $^{13}\text{C}$  NMR (126 MHz,  $\text{CDCl}_3$ )  $\delta$  161.72, 160.17, 146.75, 145.59, 140.11, 138.51, 130.11, 127.51, 119.99, 115.93, 115.26, 115.02, 113.50, 113.12, 55.44, 43.57, 21.55, 17.02. HRMS (EI),  $M+1$  calcd. for  $\text{C}_{18}\text{H}_{20}\text{N}_3\text{O}_2$ , 310.1550; found 310.1587. HPLC  $t_{\text{R}} = 1.2$  min.

***N*-(4-Methoxybenzyl)-2,7-dimethylimidazo[1,2-*a*]pyridine-3-carboxamide (4)**

This compound was prepared using a similar coupling procedure as described for the preparation of amide **1** to give the product as a white solid. Mp 150 - 151°C;  $^1\text{H}$  NMR (300 MHz,  $\text{CDCl}_3$ )  $\delta$  9.30 (d,  $J = 6.7$  Hz, 1H), 7.32-7.28 (m, 4H), 6.89 (d,  $J = 8.2$  Hz, 1H), 6.75 (d,  $J = 7.2$  Hz, 1H), 6.04 (bs, 1H, NH), 4.66 (d,  $J = 5.4$  Hz, 2H), 3.80 (s, 3H), 2.65 (s, 3H), 2.41 (s, 3H).  $^{13}\text{C}$  NMR (126 MHz,  $\text{CDCl}_3$ )  $\delta$  161.64, 159.25, 146.65, 145.48, 138.39, 130.52, 129.19, 127.44, 115.84, 115.19, 115.05, 114.37, 55.47, 43.11, 21.51, 16.91. HRMS (EI),  $M+1$  calcd. for  $\text{C}_{18}\text{H}_{20}\text{N}_3\text{O}_2$ , 310.1550; found 310.1583. HPLC  $t_{\text{R}} = 1.1$  min.

***N*-(4-Methylbenzyl)-2,7-dimethylimidazo[1,2-*a*]pyridine-3-carboxamide (5)**

This compound was prepared using a similar coupling procedure as described for the preparation of amide **1** to give the product as a white solid. Mp 175 - 176°C;  $^1\text{H}$  NMR (300 MHz,  $\text{CDCl}_3$ )  $\delta$  9.31 (d,  $J = 7.1$  Hz, 1H), 7.33-7.27 (m, 2H), 7.18 (d,  $J = 7.8$  Hz, 2H), 6.75 (dd,  $J = 7.2, 1.8$  Hz, 1H), 6.05 (bs, 1H, NH), 4.65 (d,  $J = 5.6$  Hz, 2H), 2.65 (s, 3H), 2.41 (s, 3H), 2.35 (s, 3H).  $^{13}\text{C}$  NMR (126 MHz,  $\text{CDCl}_3$ )  $\delta$  161.71, 146.72, 145.49, 138.52, 137.60, 135.44, 129.75, 127.88, 127.55, 115.94, 115.26, 115.04, 43.46, 21.57, 21.34, 16.99. HRMS (EI),  $M+1$  calcd. for  $\text{C}_{18}\text{H}_{20}\text{N}_3\text{O}$ , 294.1601; found 294.161. HPLC  $t_{\text{R}} = 1.9$  min.

***N*-(4-Chlorobenzyl)-2,7-dimethylimidazo[1,2-a]pyridine-3-carboxamide (6)**

This compound was prepared using a similar coupling procedure as described for the preparation of amide **1** to give the product as a white solid. Mp 198 - 199°C; <sup>1</sup>H NMR (300 MHz, CDCl<sub>3</sub>) δ 9.30 (d, *J* = 7.1 Hz, 1H), 7.36-7.25 (m, 5H), 6.76 (dd, *J* = 7.2, 1.8 Hz, 1H), 6.05 (bs, 1H, NH), 4.66 (d, *J* = 5.9 Hz, 2H), 2.66 (s, 3H), 2.42 (s, 3H). <sup>13</sup>C NMR (126 MHz, CDCl<sub>3</sub>) δ 161.73, 146.72, 145.68, 138.57, 137.14, 133.48, 129.09, 127.38, 115.92, 115.20, 114.87, 42.84, 21.50, 16.95. HRMS (EI), M+1 calcd. for C<sub>17</sub>H<sub>17</sub>ClN<sub>3</sub>O, 314.1084; found 314.1055. HPLC t<sub>R</sub> = 2.1 min

***N*-(3,4-Dichlorobenzyl)-2,7-dimethylimidazo[1,2-a]pyridine-3-carboxamide (7)**

This compound was prepared using a similar coupling procedure as described for the preparation of amide **1** to give the product as a white solid. Mp 191 - 192°C; <sup>1</sup>H NMR (300 MHz, CDCl<sub>3</sub>) δ 9.30 (d, *J* = 7.1 Hz, 1H), 7.45 (m, 2H), 7.33 (s, 1H), 7.23 (d, *J* = 1.73 Hz, 1H), 6.74 (dd, *J* = 7.0, 1.1 Hz, 1H), 6.04 (bs, 1H, NH), 4.64 (d, *J* = 5.7 Hz, 2H), 2.64 (s, 3H), 2.40 (s, 3H). <sup>13</sup>C NMR (126 MHz, CDCl<sub>3</sub>) δ 161.79, 146.88, 145.87, 139.06, 138.85, 133.02, 131.77, 130.93, 129.70, 127.52, 127.07, 116.13, 115.31, 114.76, 42.51, 21.62, 17.15. HRMS (EI), M+1 calcd. for C<sub>17</sub>H<sub>16</sub>Cl<sub>2</sub>N<sub>3</sub>O, 348.0665; found 348.0631. HPLC t<sub>R</sub> = 5.4 min.

***N*-(3-Fluorobenzyl)-2,7-dimethylimidazo[1,2-a]pyridine-3-carboxamide (8)**

This compound was prepared using a similar coupling procedure as described for the preparation of amide **1** to give the product as a white solid. Mp 154 - 155°C; <sup>1</sup>H NMR (300 MHz, CDCl<sub>3</sub>) δ 9.30 (d, *J* = 7.1 Hz, 1H), 7.39-7.28 (m, 2H), 7.19-7.05 (m, 2H), 6.98 (d, *J* = 2.3 Hz, 1H), 6.74 (dd, *J* = 7.2, 1.8 Hz, 1H), 6.05 (bs, 1H, NH), 4.68 (d, *J* = 5.9 Hz, 2H), 2.68

(s, 3H), 2.42 (s, 3H).  $^{13}\text{C}$  NMR (126 MHz,  $\text{CDCl}_3$ )  $\delta$  164.24, 162.28, 161.63, 146.44, 145.19, 141.20 (d,  $J_{\text{CF}} = 6.9$  Hz, 1C), 139.15, 130.56 (d,  $J_{\text{CF}} = 8.3$  Hz, 1C), 127.57, 123.27 (d,  $J_{\text{CF}} = 2.9$  Hz, 1C), 116.27, 115.07, 114.79, 114.62, 43.08, 21.58, 16.84. HRMS (EI), M+1 calcd. for  $\text{C}_{17}\text{H}_{17}\text{FN}_3\text{O}$ , 298.1350; found 298.1380. HPLC  $t_{\text{R}} = 1.4$  min.

### ***N*-(Phenyl)-2,7-dimethylimidazo[1,2-*a*]pyridine-3-carboxamide (9)**

This compound was prepared using a similar coupling procedure as described for the preparation of amide **1** to give the product as a tan solid. Mp  $>295^\circ\text{C}$ ;  $^1\text{H}$  NMR (300 MHz,  $\text{CDCl}_3$ )  $\delta$  9.27 (d,  $J = 7.1$  Hz, 1H), 7.60 (m, 2H), 7.49 (bs, 1H, NH), 7.37 (m, 3H), 7.16 (m, 1H), 6.78 (dd,  $J = 7.1, 1.7$  Hz, 1H), 2.78 (s, 3H), 2.43 (s, 3H).  $^{13}\text{C}$  NMR (126 MHz,  $\text{CDCl}_3$ )  $\delta$  159.76, 147.05, 145.92, 138.94, 137.81, 129.36, 127.44, 124.66, 120.42, 116.17, 115.37, 115.30, 21.55, 16.99. HRMS (EI), M+1 calcd. for  $\text{C}_{16}\text{H}_{16}\text{N}_3\text{O}$ , 266.1288; found 266.1267. HPLC  $t_{\text{R}} = 1.2$  min.

### ***N*-(3-Methoxybenzyl)-2,6-dimethylimidazo[1,2-*a*]pyrimidine-3-carboxamide (10)**

2,6-Dimethylimidazo[1,2-*a*]pyrimidine-3-carboxylic acid (purchased from PracticaChem LLC (<http://www.practicachem.com/>); 50 mg, 0.25 mmol) and 3-methoxybenzylamine (39  $\mu\text{L}$ , 0.3 mmol) were dissolved in 2 mL of acetonitrile (ACN) and treated with *N*-(3-dimethylaminopropyl)-*N'*-ethylcarbodiimide hydrochloride (EDC, 96 mg, 0.5 mmol) and 4-dimethylaminopyridine (DMAP, 92 mg, 0.75 mmol). The resulting solution was stirred for 12 h at room temperature. The reaction mixture was diluted with  $\text{CH}_2\text{Cl}_2$ , washed with 10% aqueous  $\text{NaHCO}_3$  solution (2x), water and 5% acetic acid solution (2x). The organic phase was collected, dried over  $\text{Na}_2\text{SO}_4$ , filtered and then concentrated *in vacuo*. Crude material



obtained was purified by silica gel column chromatography with a 20% ethyl acetate : CH<sub>2</sub>Cl<sub>2</sub> solvent system to give 38 mg (49%) of **10** as a white solid. Mp 148 - 149°C; <sup>1</sup>H NMR (300 MHz, CDCl<sub>3</sub>) δ 9.55 (qd, *J* = 2.1, 1.0, 1.0, 1.0 Hz, 1H), 8.49 (d, *J* = 2.5 Hz, 1H), 7.29 (t, *J* = 7.9, 7.9 Hz, 1H), 6.89 (m, 3H), 6.15 (m, 1H, NH), 4.67 (d, *J* = 5.7 Hz, 2H), 3.81 (s, 3H), 2.72 (s, 3H), 2.39 (s, 3H). <sup>13</sup>C NMR (126 MHz, CDCl<sub>3</sub>) δ 161.32, 158.50, 154.03, 148.38, 147.17, 139.73, 133.93, 130.14, 119.70, 119.36, 115.50, 114.84, 113.50, 70.00, 43.63, 22.21, 17.10. HRMS (EI), M+1 calcd. for C<sub>17</sub>H<sub>19</sub>N<sub>4</sub>O<sub>2</sub>, 311.1503; found 311.1495. HPLC t<sub>R</sub> = 3.9 min.

**Description of TB (GAS<sup>1</sup>, GAST<sup>2</sup>, 7H12<sup>1</sup>) by Microplate Alamar Blue assay (MABA) to determine MIC<sub>90</sub> values against replicating TB:**

The test compound MICs against *Mtb* H<sub>37</sub>Rv (ATCC# 27294) were assessed by the MABA using rifampin and PA-824 as positive controls. Compound stock solutions were prepared in DMSO at a concentration of 128 μM, and the final test concentrations ranged from 128 μM to 0.5 μM. Two fold dilutions of compounds were prepared in glycerol-alanine-salt media in a volume of 100 μL in 96-well microplates (BD Optilux™, 96-well Microplates, black/clear flat bottom) for the GAS assay, in an iron deficient glycerol-alanine-salt media with 0.05% Tween 80 added in the GAST assay and in Middlebrook 7H12 medium (7H9 broth containing 0.1% w/v casitone, 5.6 μg/mL palmitic acid, 5 mg/mL bovine serum albumin, 4 mg/mL catalase) in a volume of 100 μL in 96-well microplates (BD Optilux™, 96-well Microplates, black/clear flat bottom) for the 7H12 assay. The TB cultures (100 μL inoculums of 2 × 10<sup>5</sup> cfu/mL) were added to the media, yielding a final testing volume of 200 μL. The plates were incubated at 37°C. On the seventh day of incubation, 12.5 μL of 20%

Tween 80, and 20  $\mu$ L of Alamar Blue (Invitrogen BioSource™) were added to the wells of test plate. After incubation at 37 °C for 16-24 h, fluorescence of the wells was measured at 530 nm (excitation) and 590 nm (emmission). The MICs are defined as the lowest concentration effecting a reduction in fluorescence of  $\geq 90\%$  relative to the mean of replicate bacteria-only controls. For clinical strains, MIC determination was performed in 7H9 Middlebrook media supplemented with 0.2% glycerol/ 0.2 % glucose/ 0.5% BSA/ 0.08% NaCl/0.05% Tween 80 in a 2-fold dilution of compound series as above. The 96-well microplates contained a final volume of 100  $\mu$ L at  $2 \times 10^4$  cfu/well and were scored for growth after 1-week incubation at 37 °C. The MIC was determined to be the concentration of compound that completely inhibited all growth of cells.

**Description of low-oxygen recovery assay (LORA<sup>3</sup>) to determine activity against non-replicating *M. tuberculosis*:**

A low-oxygen adapted culture of recombinant H<sub>37</sub>Rv (pFCA-luxAB), expressing a *Vibrio harveyii* luciferase gene with an acetamidase promoter, was grown in a BiostatQ fermentor. Cells were collected on ice, washed in PBS, and stored at  $-80^{\circ}\text{C}$ . Circa  $10^5$  cfu/mL of thawed NRP cells were exposed to 2-fold serial dilutions of test compound in 7H12 broth in black 96-well plates, which were incubated anaerobically at 37°C for 10 days. Luminescence readings were obtained following a 28 h recovery in an aerobic environment (5% CO<sub>2</sub>). The data were analyzed graphically, and the lowest concentration of test compound preventing metabolic recovery (90% reduction relative to untreated cultures) was determined.

**Description of VERO<sup>4</sup> cytotoxicity assay to determine IC<sub>50</sub> values:**

Samples were dissolved at 12.8 mM in DMSO. Geometric three-fold dilutions were performed in growth medium MEM (Gibco, Grand Island, NY), containing 10% S5 fetal bovine serum (HyClone, Logan, UT), 25 mM *N*-(2-hydroxyethyl)-piperazine-*N'*-2-ethanesulfonic acid (HEPES, Gibco), 0.2% NaHCO<sub>3</sub> (Gibco), and 2 mM glutamine (Irvine Scientific, Santa Ana, CA). Final DMSO concentrations did not exceed 1% v/v. Drug dilutions were distributed in duplicate in 96-well tissue culture plates (Becton Dickinson Labware, Lincoln Park, NJ) at a volume of 50  $\mu$ L per well. An equal volume containing  $5 \times 10^5$  log phase VERO cells (Green African Monkey kidney cells, CCL-81; American Type Culture Collection, Rockville, MD) was added to each well and the cultures were incubated at 37 °C in an atmosphere containing 5% of CO<sub>2</sub>. After 72 h, cell viability was measured using the CellTiter 96 aqueous non-radioactive cell proliferation assay (Promega Corp., Madison, WI) according to the manufacturer's instructions. Then absorbance at 490 nm was read in a Victor multilabel reader (PerkinElmer). The IC<sub>50</sub> values (inhibition concentration at 50%) were determined using a curve-fitting program.

#### **Spectrum of activity assays:**

MICs against all other microorganisms were determined at an equal weight/volume basis using a standard microbroth dilution assay,<sup>5</sup> and the data were expressed in  $\mu$ M.

#### **Description of microsomal assay for compounds 1, 3, 4, and 6:**

Compounds (1 mM in DMSO) were mixed with NADPH (10 mM) in potassium phosphate buffer (66.7 mM, pH 7.4) in a total volume of 1 mL and preincubated at 37° C for 5 min. The reaction was started by adding pooled male rat liver and human hepatic microsomes (Fischer

344 and lot 18888, respectively) purchased from BD Gentest (Woburn, MA). After a 30-min incubation, the reaction was quenched with 0.5% formic acid in acetonitrile containing internal standard (phenacetin) and centrifuged to remove protein. A second incubation was terminated at time 0. An aliquot of the supernatant was analyzed by LC/MS (Applied Biosystem API 4000) with UV detection at 254 nm. The peak area ratio relative to internal standard was measured and compared relative to that at time 0 and reported as percent metabolized and half-life calculated.

**Microsomal results for compound 1, 3, 4, and 6:**

| Compound code | % metabolized ( $t_{1/2}$ , min) |        |
|---------------|----------------------------------|--------|
|               | RLM                              | HLM    |
| 1             | 71(17)                           | 59(24) |
| 3             | 80(13)                           | 47(35) |
| 4             | 69(19)                           | 30(58) |
| 6             | 79(13)                           | 82(12) |

Microsomal stability experiment has been performed in Human and Rat Liver Microsomes (HLM and RLM). Verapamil was used as control and it was in acceptable range ( $85 \pm 7$ ).

**Protein binding assay description for compounds 1 and 10:**

MICs were compared by MABA using Middlebrook 7H12 medium against *M. tuberculosis* H<sub>37</sub>Rv in the presence and absence of 10% fetal bovine serum (FBS) and in the presence of 4% w/v bovine serum albumin (BSA). The latter is more stringent with regard to protein binding while the former should detect other serum-mediated abrogation of anti-TB activity.

The luminescent measurement of intracellular ATP was used an alternative readout for protein binding assay. The plates were incubated at 37 °C. On the seventh day of incubation, Cell Lysis agent and Luciferase Reagent (Roche, ATP Bioluminescence Assay Kit HS II) were added to the wells of test

plate. Luminescence of the wells was measured and the MICs were defined as the lowest concentration effecting a reduction in Luminescence of  $\geq 90\%$  relative to the mean of replicate bacteria-only controls.

| Compound ID | 7H12    |      | 4%BSA   |      |       | 10%FBS |      |       |
|-------------|---------|------|---------|------|-------|--------|------|-------|
|             | ATP     | MABA | ATP     | MABA | MABA2 | ATP    | MABA | MABA2 |
| 1           | < 0.195 | 0.38 | < 0.195 | 0.28 | 0.23  | 0.21   | 0.91 | 0.76  |
| 10          | 2.24    | 4.95 | 2.32    | 4.02 | 2.39  | 2.45   | > 5  | > 5   |
| RMP         |         | 0.06 |         | 0.11 |       |        | 0.21 |       |
| INH         |         | 0.38 |         | 0.49 |       |        | 0.25 |       |

### *In vivo* PK information for compounds 1, 3, 4, and 6:

Discussion of *in vivo* PK for compound 1.

The pharmacokinetics of compound 1 was evaluated in Sprague-Dawley (SD) rats following a single 10 mg/kg dose administration by oral route and 1 mg/kg dose by IV. Following oral administration maximum plasma concentration ( $C_{max}$ ) was achieved at  $\sim 0.25$  h ( $t_{max}$ ). Following IV administration, elimination half life ( $t_{1/2}$ ) was found to be  $\sim 0.35$  h and clearance was  $\sim 91$  mL/min/kg. The absolute bioavailability was  $\sim 76\%$ .

**Table 1:** Pharmacokinetic parameters of compound 1 after an oral dose of 10 mg/kg.

| PK parameter               | Animal no.                                           |      |         |         | Mean    | S.D.    | CV%  |
|----------------------------|------------------------------------------------------|------|---------|---------|---------|---------|------|
|                            | 1                                                    | 2    | 3       | 4       |         |         |      |
| $t_{1/2\beta}$ (h)         | 0.45                                                 | 0.66 | 0.59    | 0.55    | 0.56    | 0.08    | 15.0 |
| $AUC_{0-t}$ (ng·h/mL)      | 1342                                                 | 1404 | 1739    | 1234    | 1430    | 218     | 15.2 |
| $AUC_{0-\infty}$ (ng·h/mL) | 1344                                                 | 1410 | 1746    | 1237    | 1434    | 219     | 15.3 |
| $C_{max}$ (ng/mL)          | 2630                                                 | 3068 | 3653    | 2696    | 3012    | 469     | 15.6 |
| $t_{max}$ (h)              | 0.25                                                 | 0.25 | 0.25    | 0.25    | 0.25    | 0.00    | 0.00 |
|                            | F (%)                                                |      | 75.9    |         |         |         |      |
|                            | Time points considered in $t_{1/2\beta}$ calculation |      | 1 – 4 h | 1 – 4 h | 1 – 4 h | 1 – 4 h |      |

**Table 2:** Pharmacokinetic parameters of compound 1 after an IV dose of 1 mg/kg.

| PK parameter          | Animal no. |      |      | Mean | S.D. | CV%  |
|-----------------------|------------|------|------|------|------|------|
|                       | 1          | 2    | 3    |      |      |      |
| $t_{1/2\beta}$ (h)    | 0.41       | 0.34 | 0.30 | 0.35 | 0.06 | 16.4 |
| $C_{max}$ (ng/mL)     | 539        | 460  | 367  | 455  | 86.0 | 18.9 |
| $C_0$ (ng/mL)         | 776        | 703  | 621  | 700  | 77.5 | 11.1 |
| $AUC_{0-t}$ (ng·h/mL) | 225        | 190  | 146  | 187  | 39.6 | 21.2 |

|                                                                       |      |           |           |           |      |      |
|-----------------------------------------------------------------------|------|-----------|-----------|-----------|------|------|
| <b>AUC<sub>0-∞</sub></b> (ng·h/mL)                                    | 229  | 192       | 146       | 189       | 41.5 | 22.0 |
| <b>CL</b><br>(mL/min/kg)                                              | 72.7 | 86.9      | 114       | 91.2      | 21.0 | 23.0 |
| <b>V<sub>d</sub></b> (L/kg)                                           | 2.60 | 2.57      | 2.95      | 2.71      | 0.21 | 7.93 |
| <b>V<sub>dss</sub></b> (L/kg)                                         | 1.70 | 1.60      | 1.87      | 1.72      | 0.14 | 8.07 |
| <b>Time points considered in t<sub>1/2β</sub> calculation</b>         |      | 0.5 – 2 h | 0.5 – 2 h | 0.5 – 2 h |      |      |
| C <sub>0</sub> calculated manually considering initial 3 time points. |      |           |           |           |      |      |

t<sub>1/2β</sub>: terminal half life; AUC<sub>0-t</sub>: the area under the plasma concentration-time curve from 0 to last measurable time point; AUC<sub>0-∞</sub>: area under the plasma concentration-time curve from time zero to infinity; C<sub>max</sub>: maximum observed plasma concentration; t<sub>max</sub>: time to the maximum observed plasma concentration; V<sub>d</sub>: volume of distribution; V<sub>dss</sub>: volume of distribution at steady state; NA: not applicable; F: oral bioavailability.

Discussion of *in vivo* PK for compound **3**.

The pharmacokinetics of compound **3** was evaluated in SD rats following a single 10 mg/kg dose administration by oral route and 1 mg/kg dose by IV. Following oral administration maximum plasma concentration (C<sub>max</sub>) was achieved at ~0.25 h (t<sub>max</sub>). Following IV administration, elimination half life (t<sub>1/2</sub>) was found to be ~0.33 h and clearance was ~43 mL/min/kg. The absolute bioavailability was ~43%.

**Table 1:** Pharmacokinetic parameters of compound **3** after an oral dose of 10 mg/kg.

| PK parameter                                                  | Animal no. |         |         | Mean    | S.D. | CV%  |
|---------------------------------------------------------------|------------|---------|---------|---------|------|------|
|                                                               | 2          | 3       | 4       |         |      |      |
| t <sub>1/2β</sub> (h)                                         | 0.41       | 0.40    | 0.40    | 0.40    | 0.01 | 2.02 |
| AUC <sub>0-t</sub> (ng·h/mL)                                  | 1445       | 1678    | 1895    | 1672    | 225  | 13.5 |
| AUC <sub>0-∞</sub> (ng·h/mL)                                  | 1446       | 1679    | 1896    | 1673    | 225  | 13.5 |
| C <sub>max</sub> (ng/mL)                                      | 2635       | 3050    | 3734    | 3140    | 555  | 17.7 |
| t <sub>max</sub> (h)                                          | 0.25       | 0.25    | 0.25    | 0.25    | 0.00 | 0.00 |
| <b>F (%)</b>                                                  |            | 43.1    |         |         |      |      |
| <b>Time points considered in t<sub>1/2β</sub> calculation</b> |            | 1 – 4 h | 1 – 4 h | 1 – 4 h |      |      |

**Table 2:** Pharmacokinetic parameters of compound **3** after an IV dose of 1 mg/kg.

| PK parameter          | Animal no. |      |      | Mean | S.D. | CV%  |
|-----------------------|------------|------|------|------|------|------|
|                       | 2          | 3    | 4    |      |      |      |
| t <sub>1/2β</sub> (h) | 0.53       | 0.24 | 0.21 | 0.33 | 0.18 | 54.0 |

|                                                                       |      |           |           |            |      |      |
|-----------------------------------------------------------------------|------|-----------|-----------|------------|------|------|
| $C_{max}$ (ng/mL)                                                     | 501  | 1073      | 926       | 833        | 297  | 35.7 |
| $C_0$ (ng/mL)                                                         | 604  | 1677      | 1555      | 1279       | 587  | 45.9 |
| $AUC_{0-t}$ (ng·h/mL)                                                 | 353  | 422       | 353       | 376        | 39.7 | 10.6 |
| $AUC_{0-\infty}$ (ng·h/mL)                                            | 378  | 422       | 364       | 388        | 30.7 | 7.90 |
| $CL$ (mL/min/kg)                                                      | 44.1 | 39.5      | 45.8      | 43.1       | 3.30 | 7.65 |
| $V_d$ (L/kg)                                                          | 2.02 | 0.81      | 0.84      | 1.22       | 0.69 | 56.3 |
| $V_{dss}$ (L/kg)                                                      | 1.74 | 0.60      | 0.63      | 0.99       | 0.65 | 65.4 |
| <b>Time points considered in <math>t_{1/2B}</math> calculation</b>    |      | 0.5 – 2 h | 0.5 – 2 h | 0.25 – 1 h |      |      |
| C <sub>0</sub> calculated manually considering initial 3 time points. |      |           |           |            |      |      |

Discussion of *in vivo* PK for compound **4**.

The pharmacokinetics of compound **4** was evaluated in SD rats following a single 10 mg/kg dose administration by oral route and 1 mg/kg dose by IV. Following oral administration maximum plasma concentration ( $C_{max}$ ) was achieved at ~0.25 h ( $t_{max}$ ). Following IV administration, elimination half life ( $t_{1/2}$ ) was found to be ~0.28 h and clearance was ~28 mL/min/kg. The absolute bioavailability was ~50%.

**Table 1:** Pharmacokinetic parameters of compound **4** after an oral dose of 10 mg/kg.

| PK parameter                                                       | Animal no. |         |         |         | Mean    | S.D. | CV%  |
|--------------------------------------------------------------------|------------|---------|---------|---------|---------|------|------|
|                                                                    | 1          | 2       | 3       | 4       |         |      |      |
| $t_{1/2B}$ (h)                                                     | 0.36       | 0.52    | 0.48    | 0.63    | 0.50    | 0.11 | 22.5 |
| $AUC_{0-t}$ (ng·h/mL)                                              | 3361       | 3254    | 2768    | 2629    | 3003    | 359  | 11.9 |
| $AUC_{0-\infty}$ (ng·h/mL)                                         | 3363       | 3261    | 2773    | 2648    | 3011    | 353  | 11.7 |
| $C_{max}$ (ng/mL)                                                  | 5787       | 6568    | 5729    | 4881    | 5741    | 689  | 12.0 |
| $t_{max}$ (h)                                                      | 0.25       | 0.25    | 0.25    | 0.25    | 0.25    | 0.00 | 0.00 |
| <b>F (%)</b>                                                       |            | 49.8    |         |         |         |      |      |
| <b>Time points considered in <math>t_{1/2B}</math> calculation</b> |            | 1 – 4 h | 1 – 4 h | 1 – 4 h | 1 – 4 h |      |      |

**Table 2:** Pharmacokinetic parameters of compound **4** after an IV dose of 1 mg/kg.

| PK parameter      | Animal no. |      |      |      | Mean | S.D. | CV%  |
|-------------------|------------|------|------|------|------|------|------|
|                   | 1          | 2    | 3    | 4    |      |      |      |
| $t_{1/2B}$ (h)    | 0.25       | 0.32 | 0.30 | 0.27 | 0.28 | 0.03 | 11.4 |
| $C_{max}$ (ng/mL) | 1337       | 1424 | 1594 | 1240 | 1399 | 150  | 10.8 |

|                                                                        |      |           |           |           |           |      |      |
|------------------------------------------------------------------------|------|-----------|-----------|-----------|-----------|------|------|
| $C_0$ (ng/mL)                                                          | 2426 | 2362      | 2292      | 2068      | 2287      | 156  | 6.82 |
| $AUC_{0-t}$ (ng·h/mL)                                                  | 564  | 676       | 657       | 510       | 602       | 78.6 | 13.1 |
| $AUC_{0-\infty}$ (ng·h/mL)                                             | 565  | 682       | 662       | 511       | 605       | 80.5 | 13.3 |
| <b>CL</b><br>(mL/min/kg)                                               | 29.5 | 24.5      | 25.2      | 32.6      | 27.9      | 3.82 | 13.7 |
| $V_d$ (L/kg)                                                           | 0.64 | 0.68      | 0.66      | 0.75      | 0.68      | 0.05 | 7.52 |
| $V_{dss}$ (L/kg)                                                       | 0.43 | 0.48      | 0.49      | 0.52      | 0.48      | 0.04 | 8.00 |
| <b>Time points considered in <math>t_{1/2\beta}</math> calculation</b> |      | 0.5 – 2 h |      |      |
| C <sub>0</sub> calculated manually considering initial 3 time points.  |      |           |           |           |           |      |      |

Discussion of *in vivo* PK for compound **6**.

The pharmacokinetics of compound **6** was evaluated in SD rats following a single 10 mg/kg dose administration by oral route and 1 mg/kg dose by IV. Following oral administration maximum plasma concentration ( $C_{max}$ ) was achieved at ~0.31 h ( $t_{max}$ ). Following IV administration, elimination half life ( $t_{1/2}$ ) was found to be ~0.40 h and clearance was ~51 mL/min/kg. The absolute bioavailability was ~49%.

**Table 1:** Pharmacokinetic parameters of compound **6** after an oral dose of 10 mg/kg.

| PK parameter                                                           | Animal no. |         |         |         | Mean    | S.D. | CV%  |
|------------------------------------------------------------------------|------------|---------|---------|---------|---------|------|------|
|                                                                        | 1          | 2       | 3       | 4       |         |      |      |
| $t_{1/2\beta}$ (h)                                                     | 1.37       | 1.85    | 1.64    | 0.60    | 1.36    | 0.54 | 39.8 |
| $AUC_{0-t}$ (ng·h/mL)                                                  | 1229       | 1997    | 1339    | 1757    | 1580    | 359  | 22.7 |
| $AUC_{0-\infty}$ (ng·h/mL)                                             | 1234       | 2021    | 1348    | 1769    | 1593    | 367  | 23.0 |
| $C_{max}$ (ng/mL)                                                      | 1472       | 2347    | 1424    | 2737    | 1995    | 652  | 32.7 |
| $t_{max}$ (h)                                                          | 0.25       | 0.50    | 0.25    | 0.25    | 0.31    | 0.13 | 40.0 |
| <b>F (%)</b>                                                           |            | 48.6    |         |         |         |      |      |
| <b>Time points considered in <math>t_{1/2\beta}</math> calculation</b> |            | 2 – 8 h | 2 – 8 h | 2 – 8 h | 1 – 4 h |      |      |

**Table 2:** Pharmacokinetic parameters of compound **6** after an IV dose of 1 mg/kg.

| PK parameter          | Animal no. |      |      |      | Mean | S.D. | CV%  |
|-----------------------|------------|------|------|------|------|------|------|
|                       | 1          | 2    | 3    | 4    |      |      |      |
| $t_{1/2\beta}$ (h)    | 0.35       | 0.32 | 0.41 | 0.51 | 0.40 | 0.08 | 20.6 |
| $C_{max}$ (ng/mL)     | 744        | 660  | 753  | 755  | 728  | 45.6 | 6.27 |
| $C_0$ (ng/mL)         | 1067       | 877  | 1037 | 1213 | 1049 | 138  | 13.1 |
| $AUC_{0-t}$ (ng·h/mL) | 310        | 294  | 317  | 364  | 321  | 29.9 | 9.32 |



|                                    |                                                                       |           |           |           |           |      |      |
|------------------------------------|-----------------------------------------------------------------------|-----------|-----------|-----------|-----------|------|------|
| <b>AUC<sub>0-∞</sub></b> (ng·h/mL) | 313                                                                   | 297       | 324       | 378       | 328       | 34.9 | 10.6 |
| <b>CL</b><br>(mL/min/kg)           | 53.2                                                                  | 56.1      | 51.5      | 44.1      | 51.2      | 5.10 | 10.0 |
| <b>V<sub>d</sub></b> (L/kg)        | 1.60                                                                  | 1.57      | 1.83      | 1.94      | 1.74      | 0.18 | 10.3 |
| <b>V<sub>dss</sub></b> (L/kg)      | 1.05                                                                  | 1.18      | 1.12      | 1.18      | 1.13      | 0.06 | 5.29 |
|                                    | <b>Time points<br/>considered in t<sub>1/2β</sub><br/>calculation</b> | 0.5 – 2 h |      |      |
|                                    | C <sub>0</sub> calculated manually considering initial 3 time points. |           |           |           |           |      |      |

### Transcriptional profiling experiments of *M. tuberculosis* treated with compound 1:

*Mycobacterium tuberculosis* growing in 7H9 Middlebrook broth base supplemented with 0.5% BSA, 0.085% sodium chloride, 0.05% Tween 80, 2 g/L glycerol and 2 g/L glucose at an OD<sub>650nm</sub> of 0.2 was treated with 0.1 or 10 µg/mL of compound for 6 hours prior to RNA extraction as previously described<sup>6,7</sup>. Control cultures were treated with an equivalent amount of vehicle control (DMSO). RNA was labeled and hybridized to Agilent 4 X 44K arrays containing the MTb genome oligo set as previously described<sup>6,7</sup>. See excel file “transcriptional-profiling-supporting-information.xlsx” for complete gene expressions of *M. tuberculosis* treated with compound 1.

### References

- Collins, L.; Franzblau, S. G. Microplate alamar blue assay versus BACTEC 460 system for high-throughput screening of compounds against *Mycobacterium tuberculosis* and *Mycobacterium avium*. *Antimicrob. Agents Chemother.* **1997**, *41*, 1004-1009.
- De Voss, J. J.; Rutter, K.; Schroeder, B. G.; Su, H.; Zhu, Y.; Barry, C. E. The salicylate-derived mycobactin siderophores of *Mycobacterium tuberculosis* are essential for growth in macrophages. *Proc. Nat. Acad. Sci. U.S.A.* **2000**, *97*, 1252-1257.
- Cho, S. H.; Warit S.; Wan B.; Hwang C. H.; Pauli G. F.; Franzblau S. G. Low-oxygen-recovery assay for high-throughput screening of compounds against nonreplicating *Mycobacterium tuberculosis*. *Antimicrob Agents Chemother.* **2007**, *51*, 1380-1385.

4. Falzari, K.; Zhou, Z.; Pan, D.; Liu, H.; Hongmanee, P.; Franzblau, S. G. *In Vitro and In Vivo* Activities of Macrolide Derivatives against *Mycobacterium tuberculosis*. *Antimicrob Agents Chemother.* **2005**, *49*, 1447-1454.
5. Clinical and Laboratory Standards Institute. 2006. Performance standards for antimicrobial susceptibility testing. CLSI document M100-S16 (M2, M7). Clinical and Laboratory Standards Institute, Wayne, PA.
6. Boshoff, H. I.; Myers, T. G.; Copp, B.R.; McNeil M. R.; Wilson, M.A.; Barry, 3<sup>rd</sup>, C. E. The transcriptional responses of *Mycobacterium tuberculosis* to inhibitors of metabolism: novel insights into drug mechanisms of action. *J. Biol. Chem.* **2004**, *38*, 40174-40184.
7. Dahl, J. L.; Kraus, C. N.; Boshoff, H. I.; Doan, B.; Foley, K.; Avarbock, D.; Kaplan, G.; Mizrahi, V.; Rubin, H.; Barry, 3<sup>rd</sup>, C. E. The role of RelMtb-mediated adaptation to stationary phase in long-term persistence of *Mycobacterium tuberculosis* in mice. *Proc. Natl. Acad. Sci. U.S.A.* **2003**, *100*, 10026-10031.

**<sup>1</sup>H NMR's and <sup>13</sup>C NMR's for compounds 1, 3, 4, and 6**



STANDARD PROTON PARAMETERS

Pulse Sequence: s2pul  
Solvent: CDCl3  
Ambient temperature  
File: nd-854-50-13  
UNIT: nd-306 -nmr301.chem.nd.edu\*

Relax. delay: 0.100 sec  
Pulse: 90.0 deg, 200  
Acq. time: 5.016 sec  
Width: 6533.3 Hz  
6 Repetitions  
OBSERVE: H1, 499.8611764 MHz  
P1: 12.00000000 sec  
P2: 0.05000000 sec  
Total time: 0 min, 41 sec

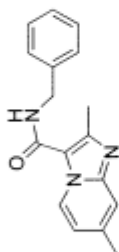

compound 1

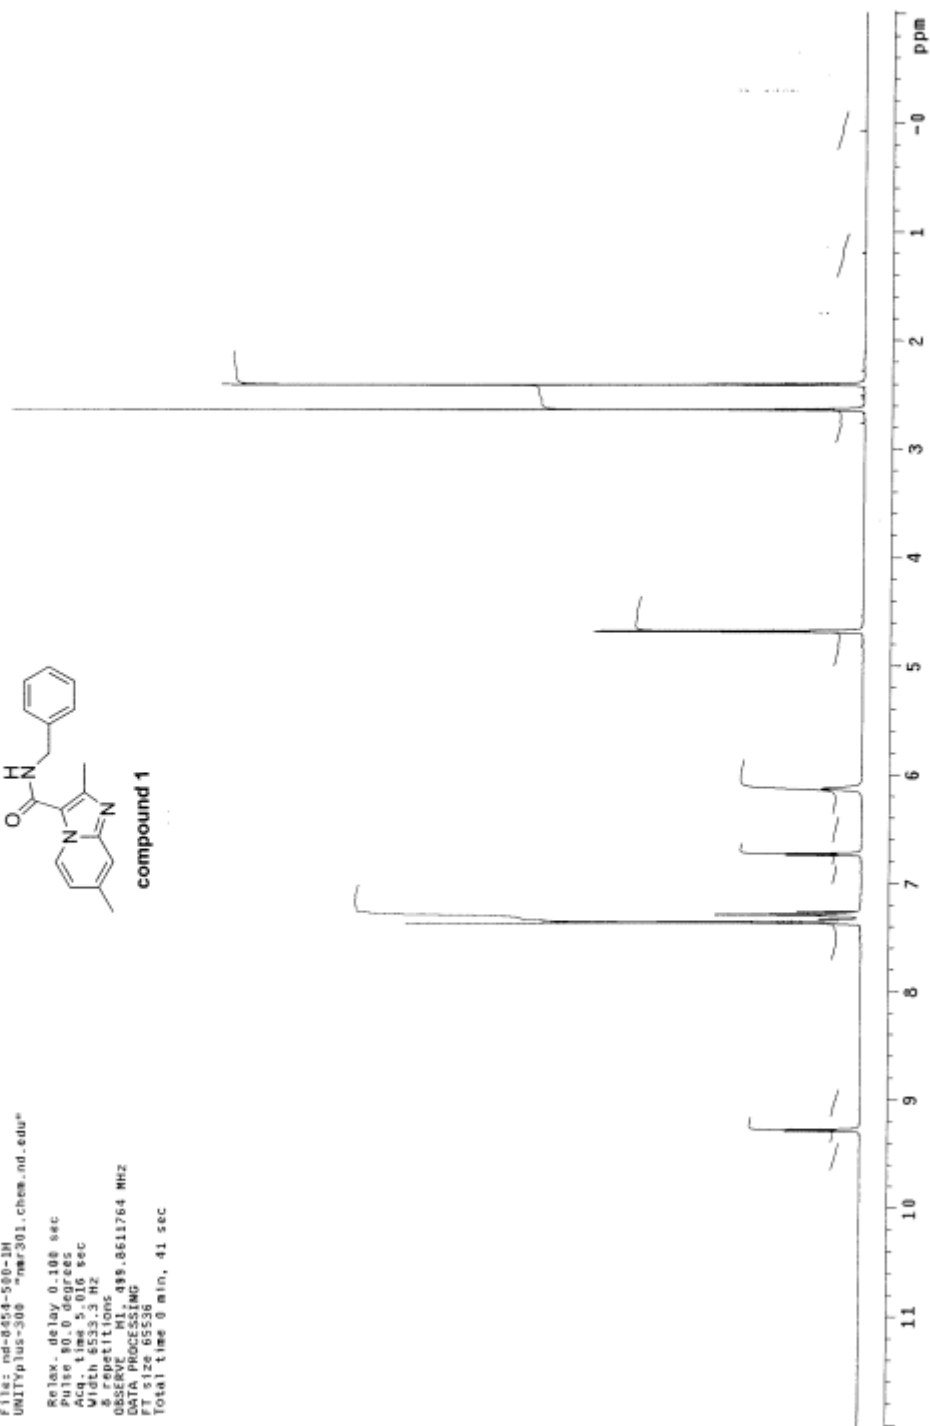

STANDARD PROTON PARAMETERS

Pulse Sequence: zgpg30  
 Solvent: CDCl3  
 Ambient Temperature  
 User: j-1487  
 File: nd-8454-c13  
 INOVA-500 "Jan20..chem.nd.edu"  
 Relax, delay 1.800 sec  
 Pulse 90.0 degrees  
 Acq. time 3.215 sec  
 F2 125.761 MHz  
 288 (40911)0MSZ  
 OBSERVE C13: 125.6301702 MHz  
 RECOUPLE H1: 495.8636613 MHz  
 Power 40.00 db  
 Continuously on  
 Vcp: 150.0000000  
 Vrf: 150.0000000  
 DATA PROCESSING  
 Line broadening 1.0 Hz  
 FT size 131072  
 Total time 4 hr, 12 min, 0 sec

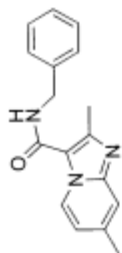

compound 1

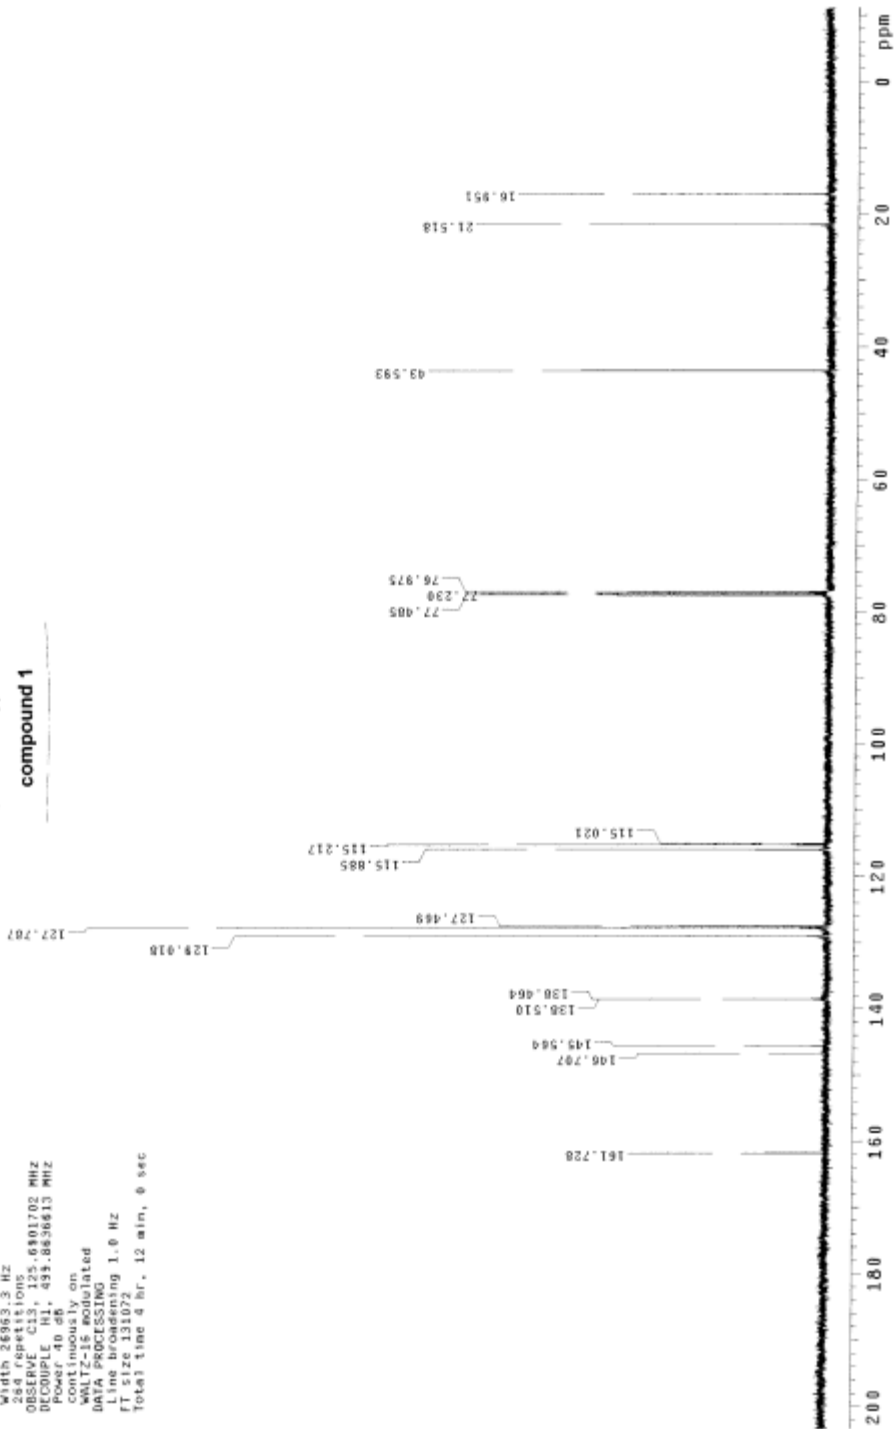

STANDARD: PROTON PARAMETERS

Pulse Sequence: s2pou1  
Solvent: CDCl3  
Acq. mode: saturs  
File: rd-8687-30M-H-580  
UNITYplus-360 "ncr391.chem.nd.edu"  
  
Relax. delay: 0.100 sec  
Pulse: 90.0 degree  
Acq. time: 5.016 sec  
Width: 6333.3 Hz  
OBSERVE: 13C  
OBSERVE F1 F2: 499.8611760 MHz  
DATA PROCESSING  
FT size: 65536  
Total time: 0 min, 41 sec

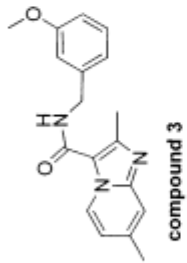

compound 3

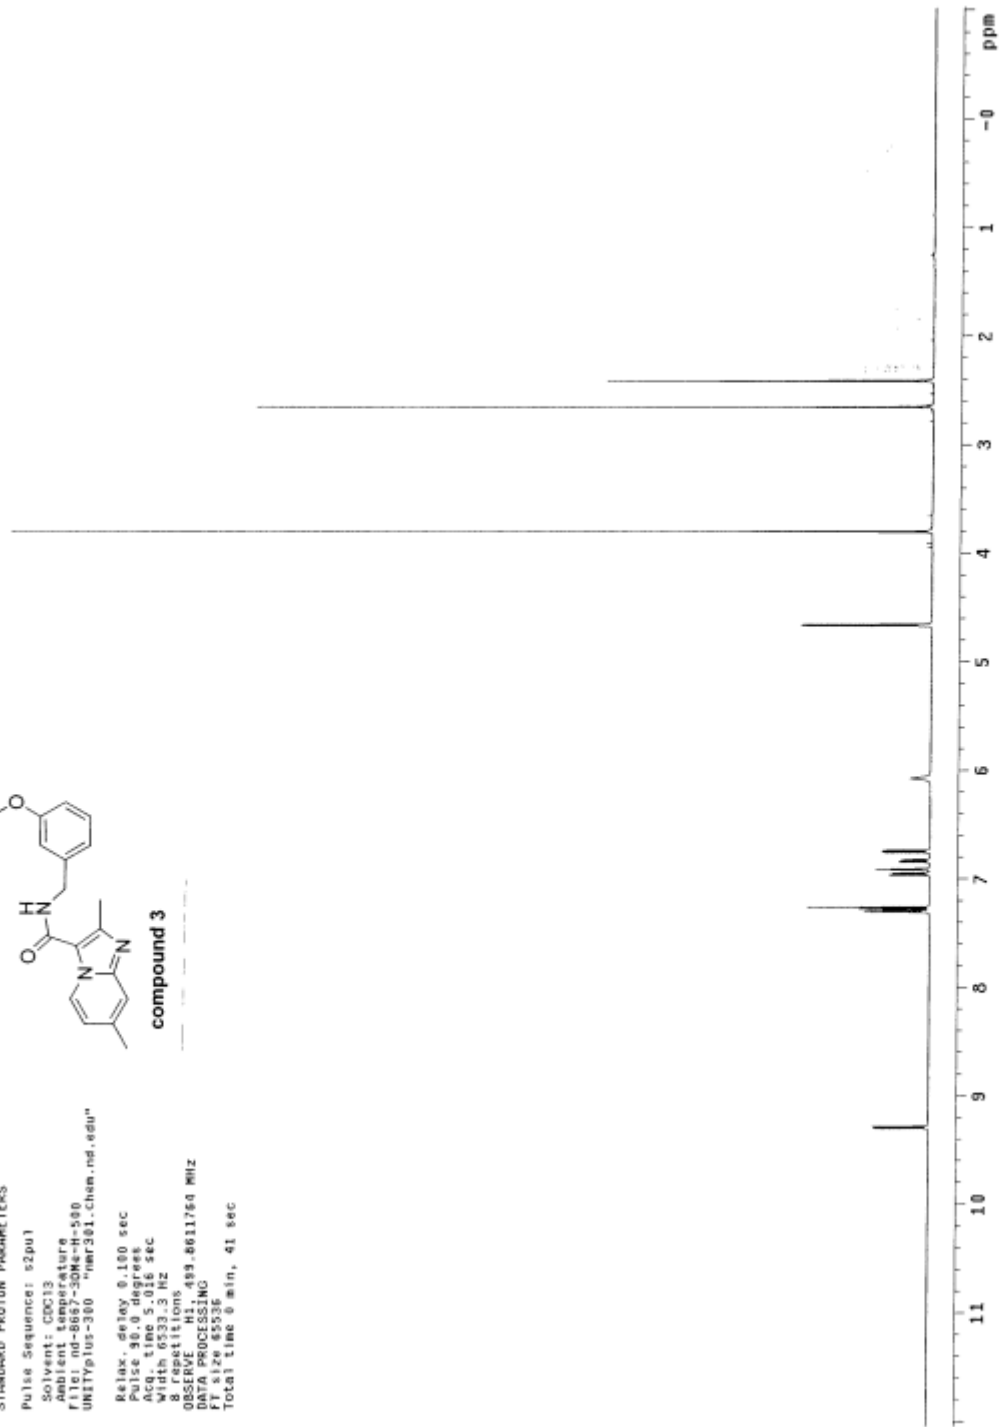

STANDARD PROTON PARAMETERS

Pulse Sequence: s2pu1  
Solvent: CDCl3  
Ambient Temperature: 500  
F1: 400.146 MHz  
UNIT: plus-300 "nmr301.chem.ind.edu"  
Relax. delay: 0.100 sec  
Pulse: 90.0 degrees  
Acq. time: 5.016 sec  
Width: 8533.3 Hz  
# repetitions: 8  
Date\_Time: 11\_09\_06.0811764 MHz  
DMS: 300CDCl3.MG  
FT: size 85538  
Total time: 0 min, 41 sec

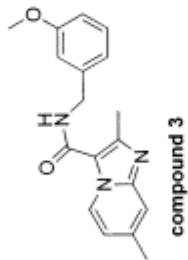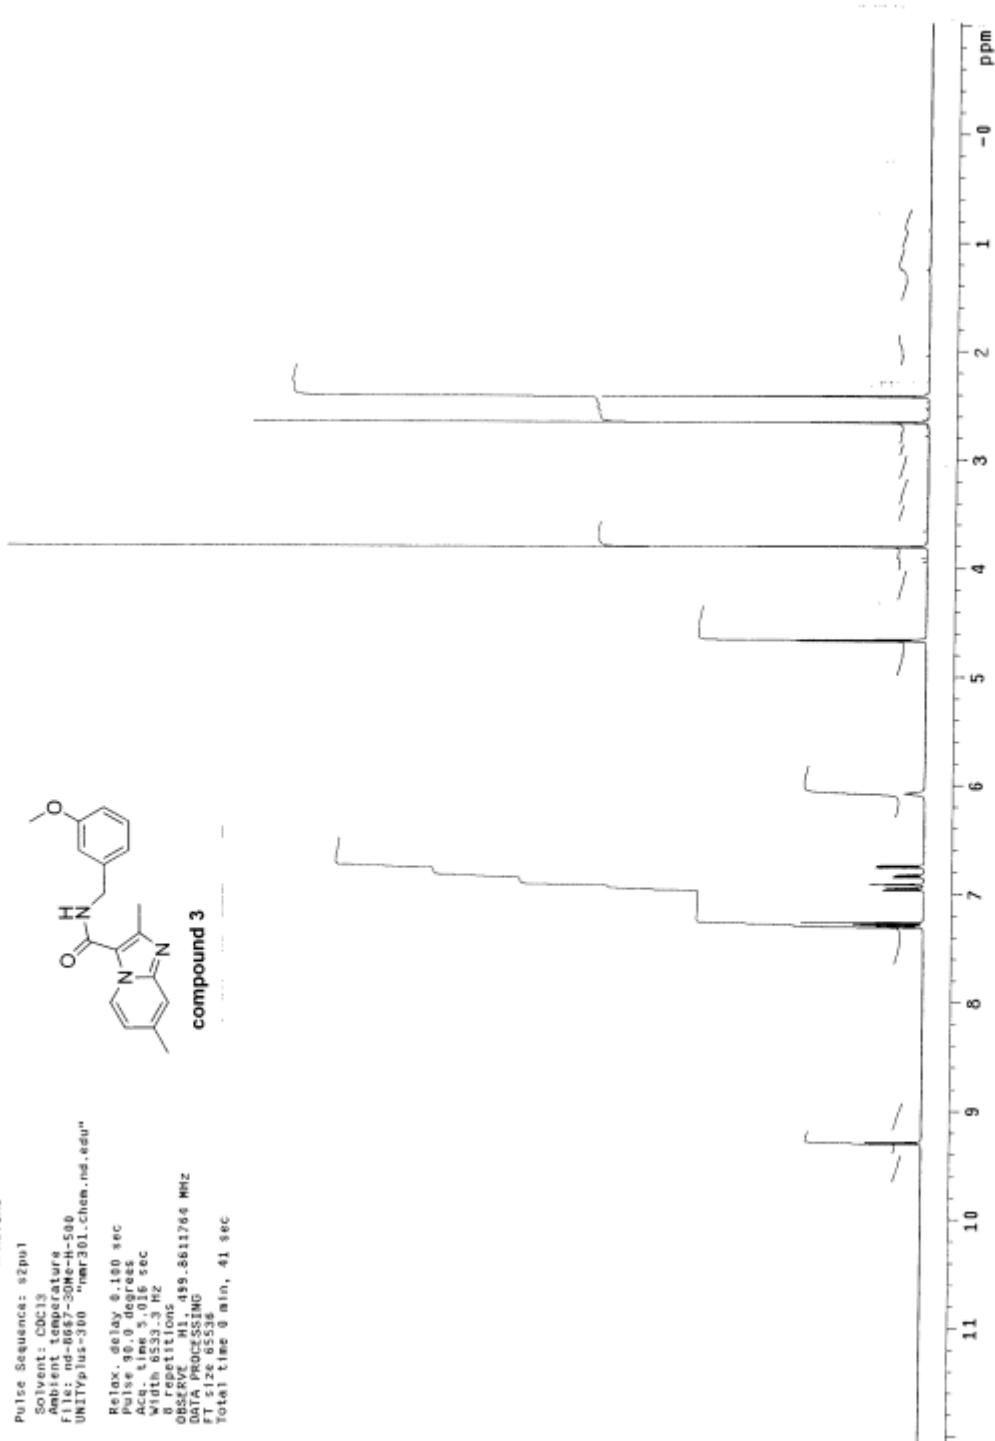

STANDARD PROTON PARAMETERS

Pulse Sequence: s2pu1  
 Solvent: CDCl3  
 Ambient temperature  
 User: 1-10-87  
 INOVA-500 "var2a.chem.nd.edu"  
 Relax delay 1.800 sec  
 Pulse 90.0 degrees  
 Acq. time 1.215 sec  
 Width 26963.3 Hz  
 520 Repetitions  
 OBSERVE C13, 125.6903677 MHz  
 PULPROG zgpg30  
 POWER 50 dB, 435.8536513 MHz  
 continuously on  
 WALTZ-16 modulated  
 DATA PROCESSING  
 Line broadening 1.0 Hz  
 F1 size 131072  
 Total time 4 hr, 12 min, 0 sec

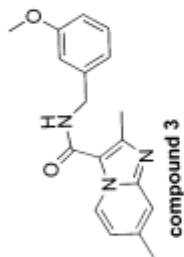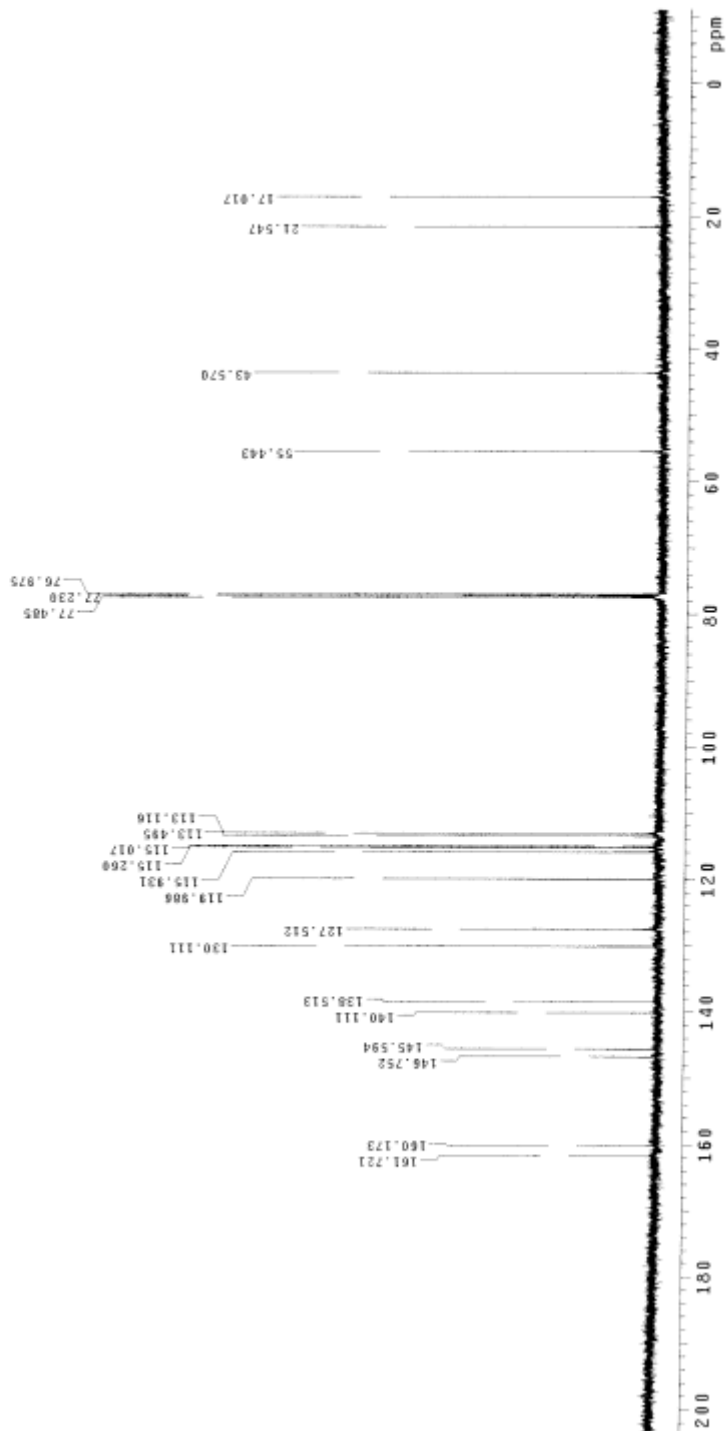



STANDARD PROTON PARAMETERS

Pulse Sequence: s2pa1  
Solvent: CDCl3  
Ambient Temperature  
File: ns-8658-M1-508  
UNITYplus-300 "nmr301.chem.ind.edu"  
Relax. delay 0.100 sec  
Pulse 90.0 degrees  
Acq. time 3.016 sec  
Width 6533.3 Hz  
Sweep rate 10000 Hz  
OBSERVE CHANNEL 489.8611868 MHz  
DATA PROCESSING  
F1 size 65536  
Total time 0 min, 41 sec

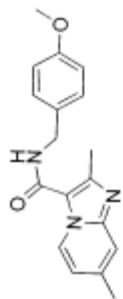

**compound 4**

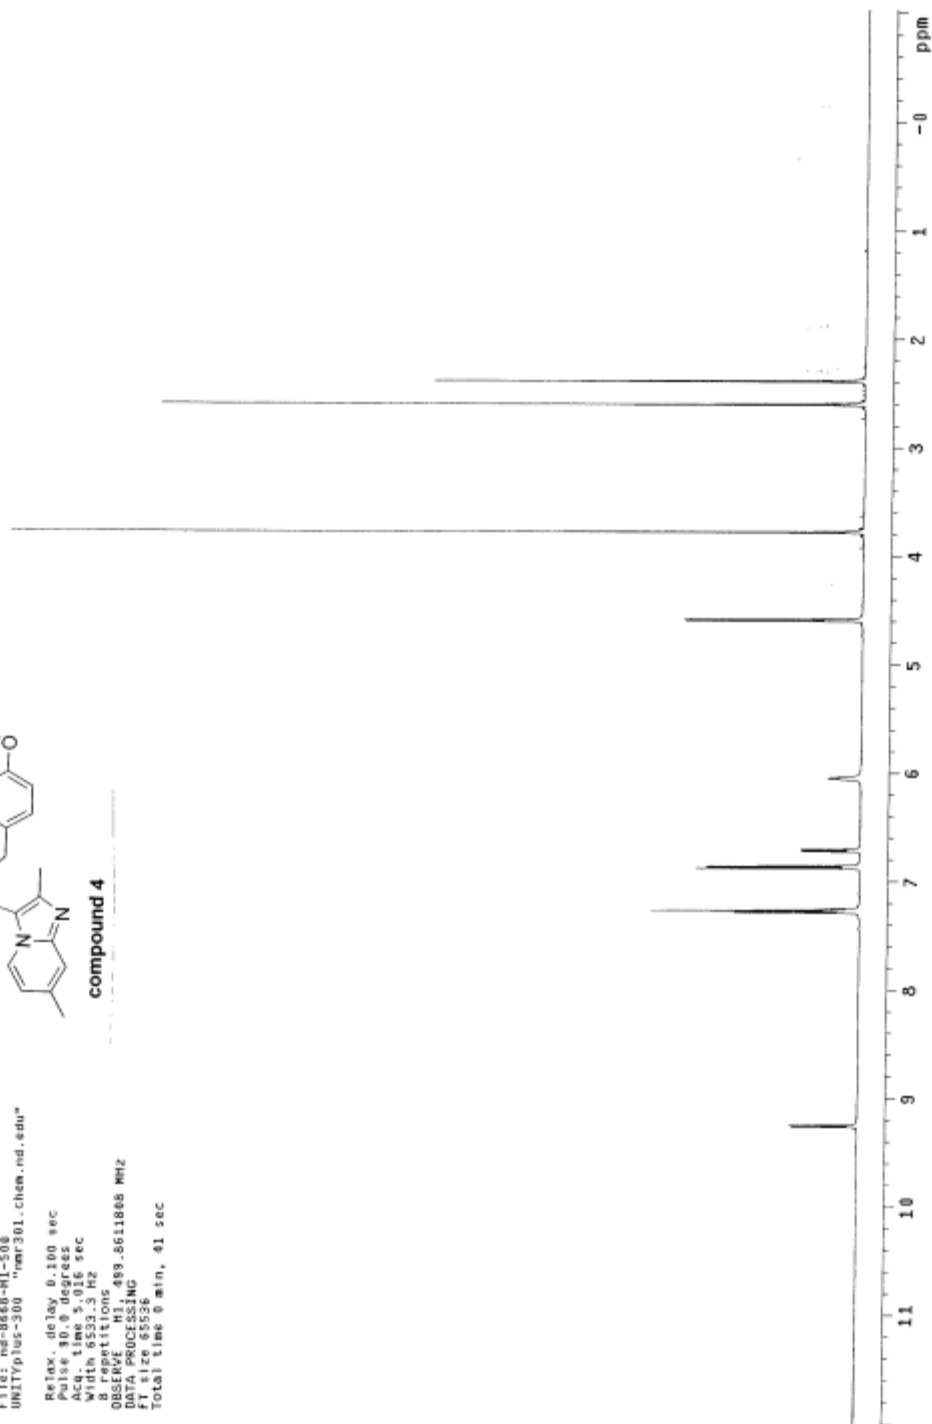

STANDARD PROTON PARAMETERS

Pulse Sequence: s2pul  
Solvent: CDCl3  
Ambient temperature  
File: nd-8668-41-500  
UNITYplus-300 "mer301.chem.nd.edu"  
Relax. delay 0.100 sec  
Pulse 90.0 degrees  
Acq. time 5.016 sec  
# F2 813.0 MHz  
# F1 499.813 MHz  
OBSERVE M1 499.8811800 MHz  
DATA PROCESSING  
FT size 65536  
Total time 0 min, 41 sec

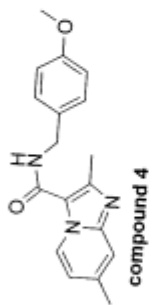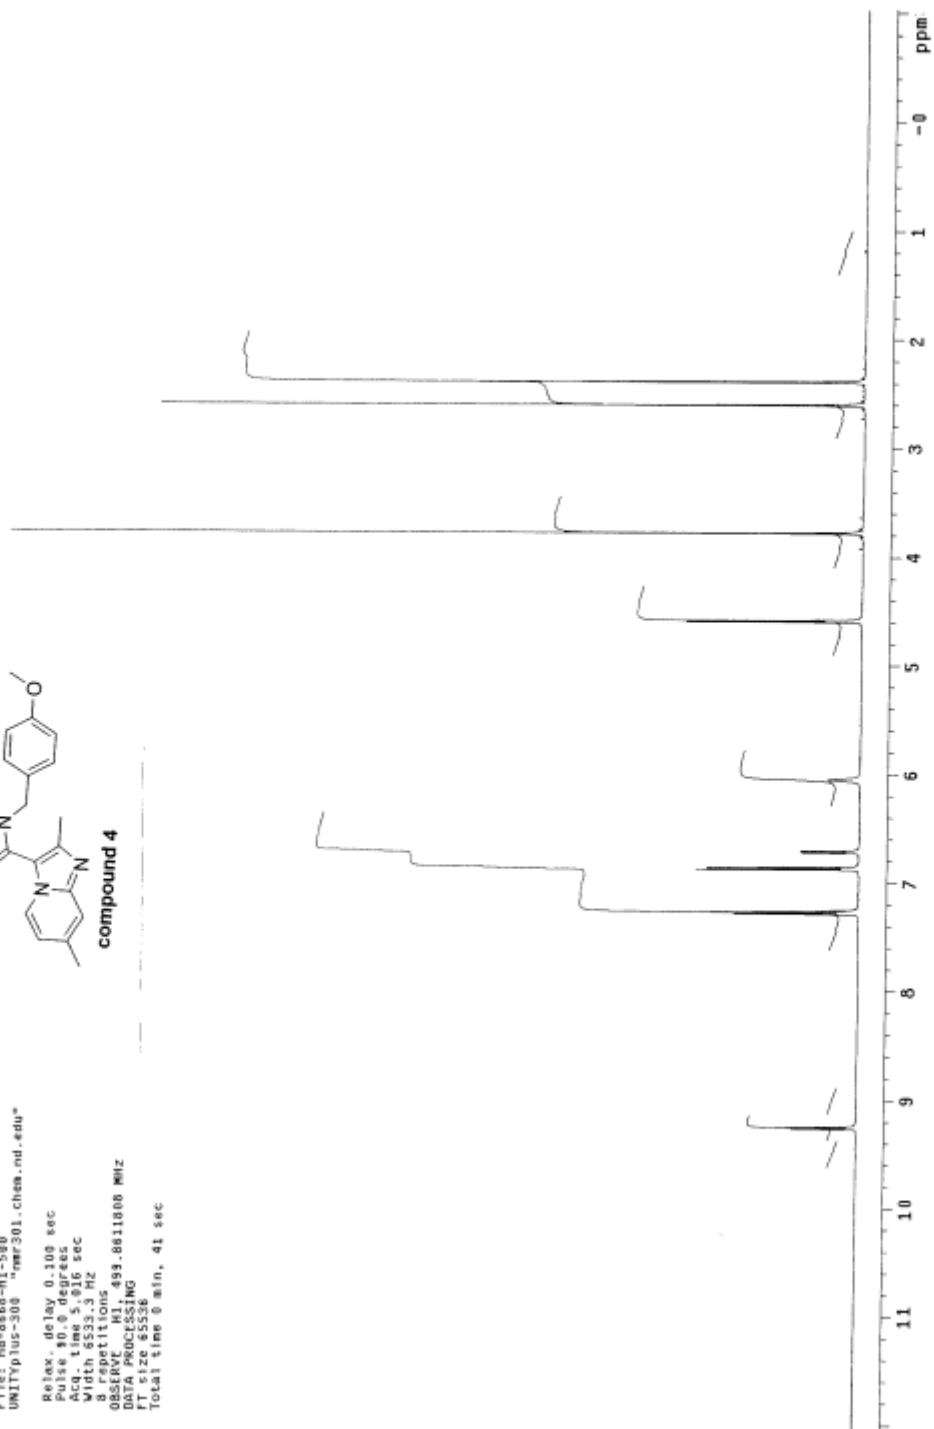

STANDARD PROTON PARAMETERS

Pulse Sequence: s2pu1  
 Solvent: CDCl3  
 Ambient Temperature  
 User: 1-19-87  
 File: nu-8608-C13  
 INOVA-500 "nmr2a.chem.nsl.edu"  
 Relax. delay 1.800 sec  
 Pulse 99.0 degrees  
 Acq. t. 1.00000000 sec  
 Width 26863.3 MHz  
 552 repetitions  
 OBSERVE C13, 125.6901796 MHz  
 DECOUPLE H1, 499.8636613 MHz  
 Coupling on  
 Cont. time on  
 MULTZ-16 modulated  
 DATA PROCESSING  
 Line broadening 1.0 Hz  
 FT size 131072  
 Total time 04 hr, 19 sec

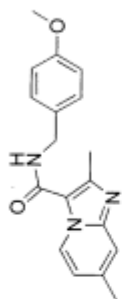

compound 4

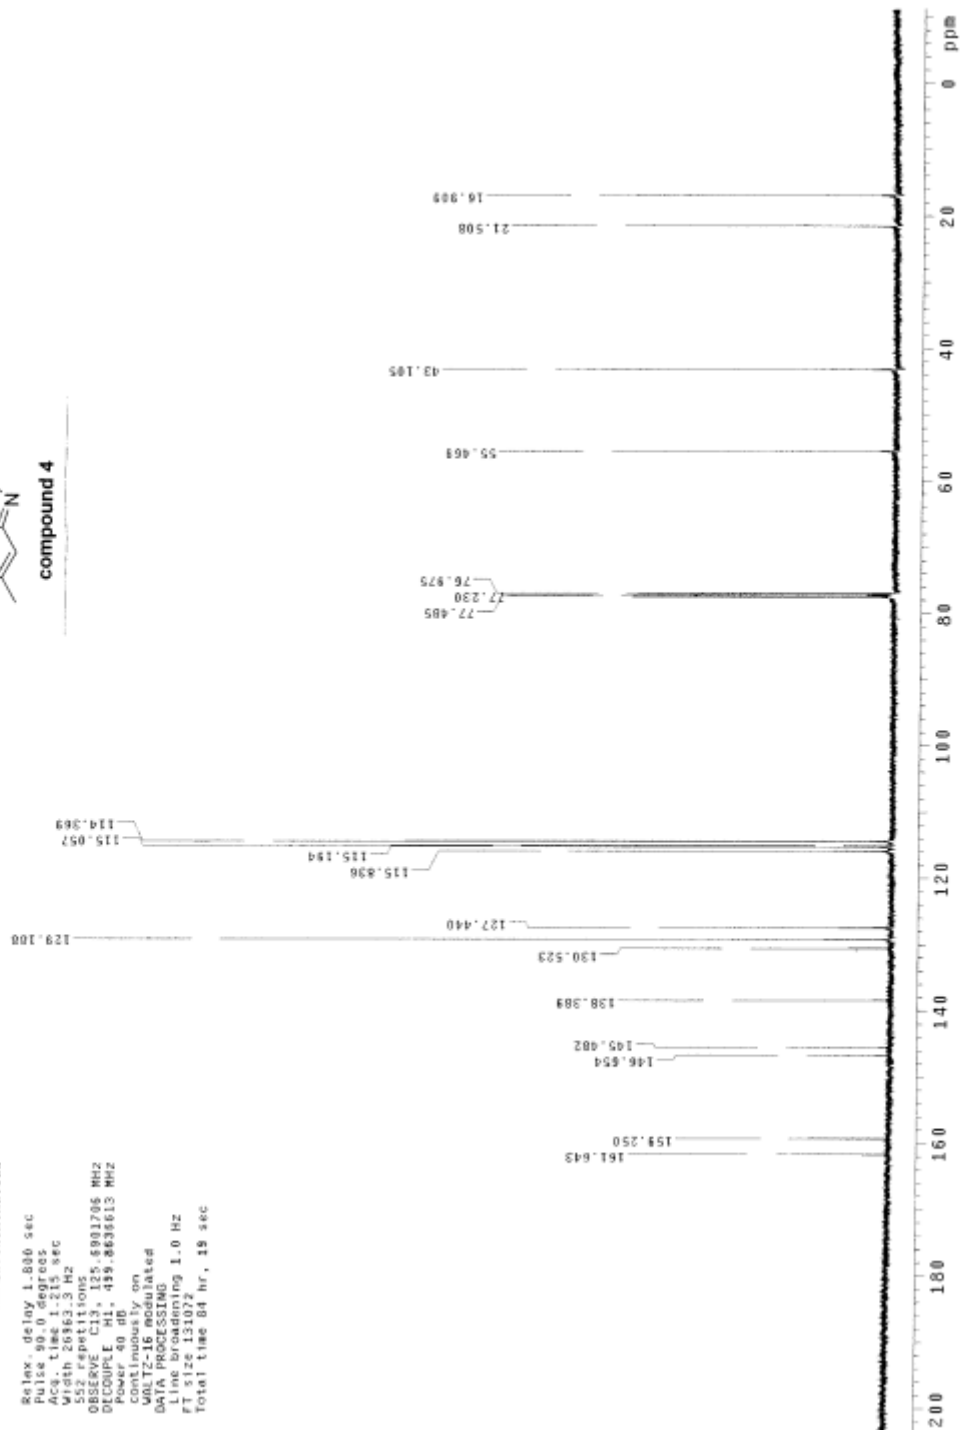

STANDARD PROTON PARAMETERS

Pulse Sequence: s2pul  
Solvent: CDCl3  
Ambient Temperature  
File: nd-8550-C1-1H-500  
UNITYplus-300 "nmr301.chem.nd.edu"  
Relax. delay 0.100 sec  
Pulse 30.0 degrees  
Acq. time 7.016 sec  
Acq. date 01/12  
# repetitions 8  
OBSERVE M1 489.8611742 MHz  
DATA PROCESSING  
FT size 65536  
Total time 0 min, 41 sec

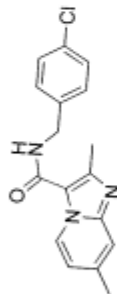

compound 6

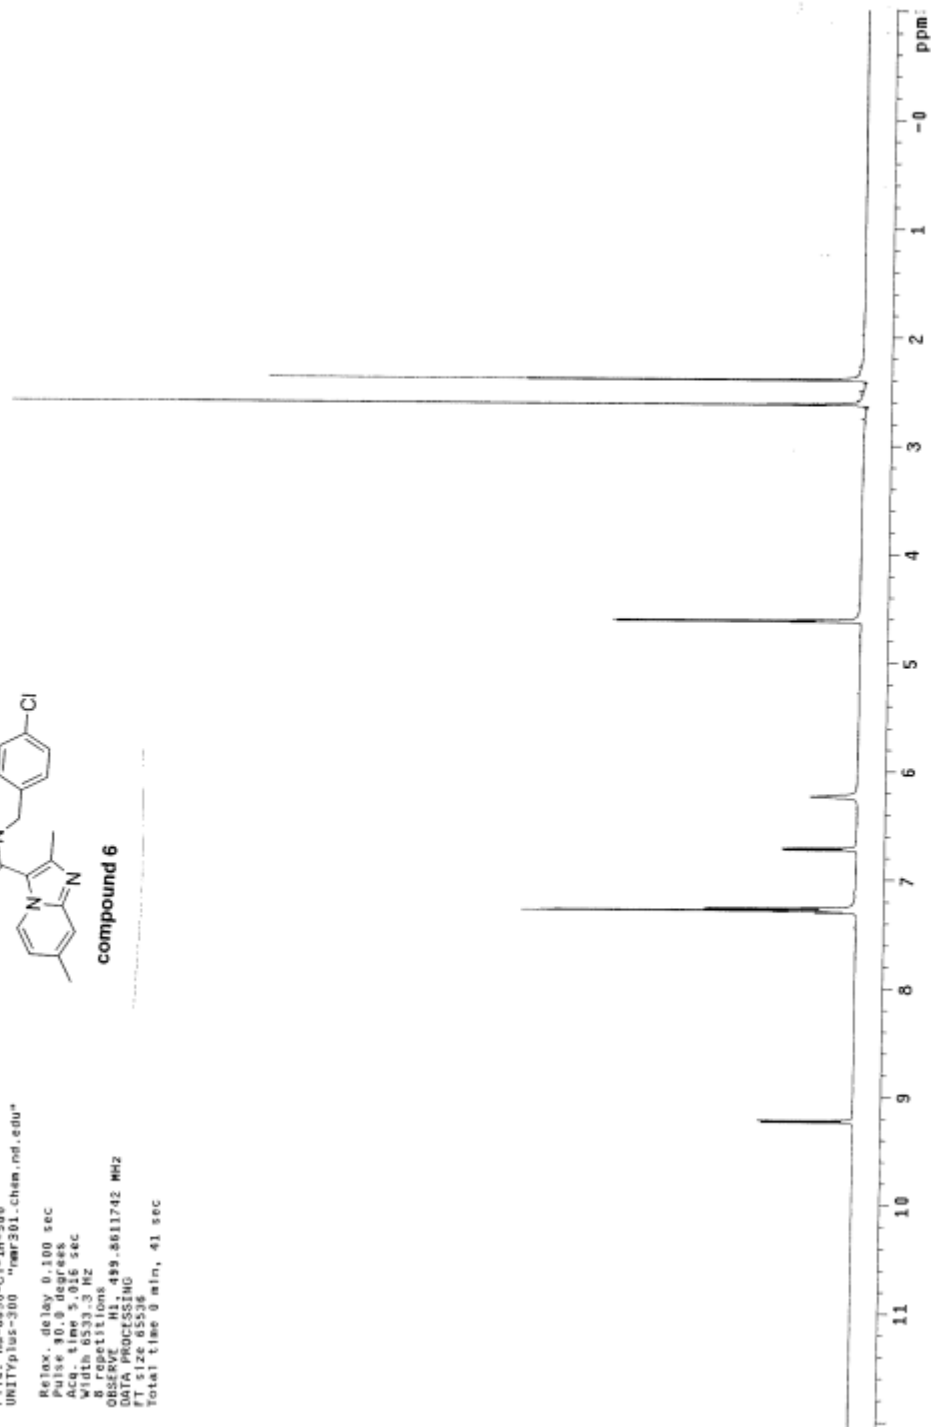

STANDARD PROTON PARAMETERS

Pulse Sequence: s2pul  
Solvent: CDCl3  
Ambient temperature  
File: nd-8450-C1-1H-500  
UNITY\lus-300 "mr301.chen.nd.edu"  
Relax. delay 0.100 sec  
Pulse 90.0 degrees  
Acq. time 5.010 sec  
F1 freq 500.136 MHz  
F2 freq 125.761 MHz  
OBSERVE H1 499.8611742 MHz  
DATA PROCESSING  
FT size 65536  
Total time 0 min, 41 sec

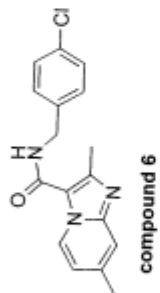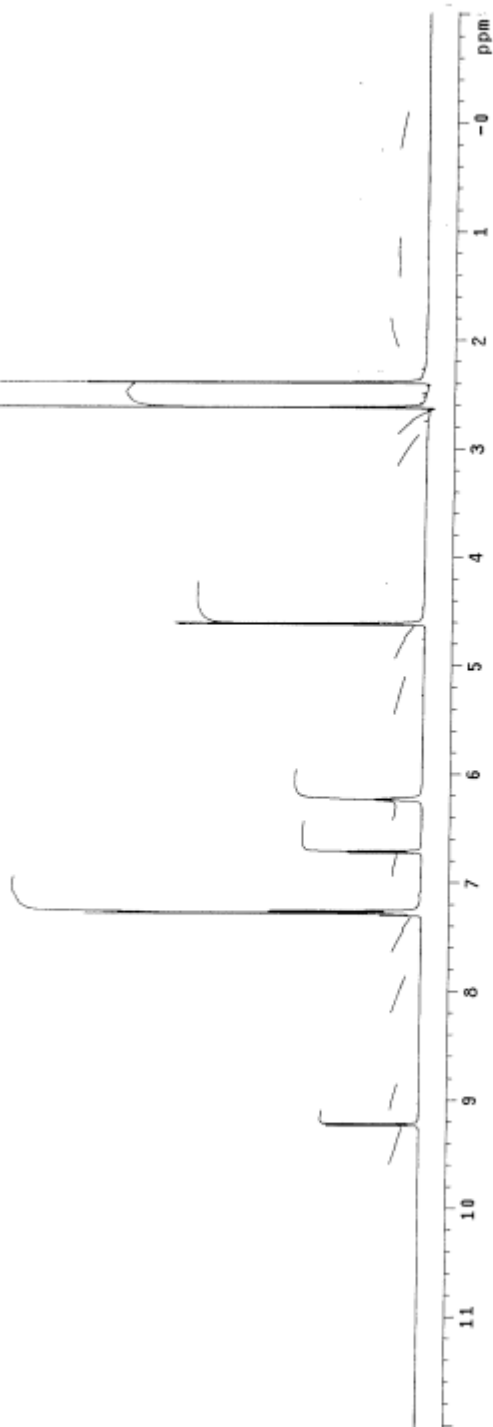

STANDARD PROTON PARAMETERS

Pulse Sequence: s2pul  
 Solvent: CDCl3  
 Acquisition Date: 11/14/87  
 User: cll3-14-87  
 File: nd-8650-C1-C13  
 Inova-500 "nmr2a.chem.nd.edu"

Relax. delay 1.800 sec  
 Pulse 80.0 degrees  
 Acq. time 1.215 sec  
 Date\_ 2093.3 Hz  
 200.000000 MHz  
 OBSERVE C13 -125.4901718 MHz  
 DECOUPLE N1 -493.8636613 MHz  
 Power 40 dB  
 Continuously on  
 N1: F1: 493.8636613 MHz  
 N2: F2: 125.4901718 MHz  
 DATA Processing  
 Line broadening 1.0 Hz  
 FT size 131072  
 Total time 4 hr. 12 min. 0 sec

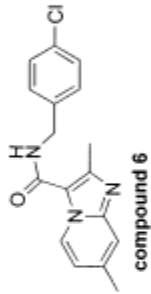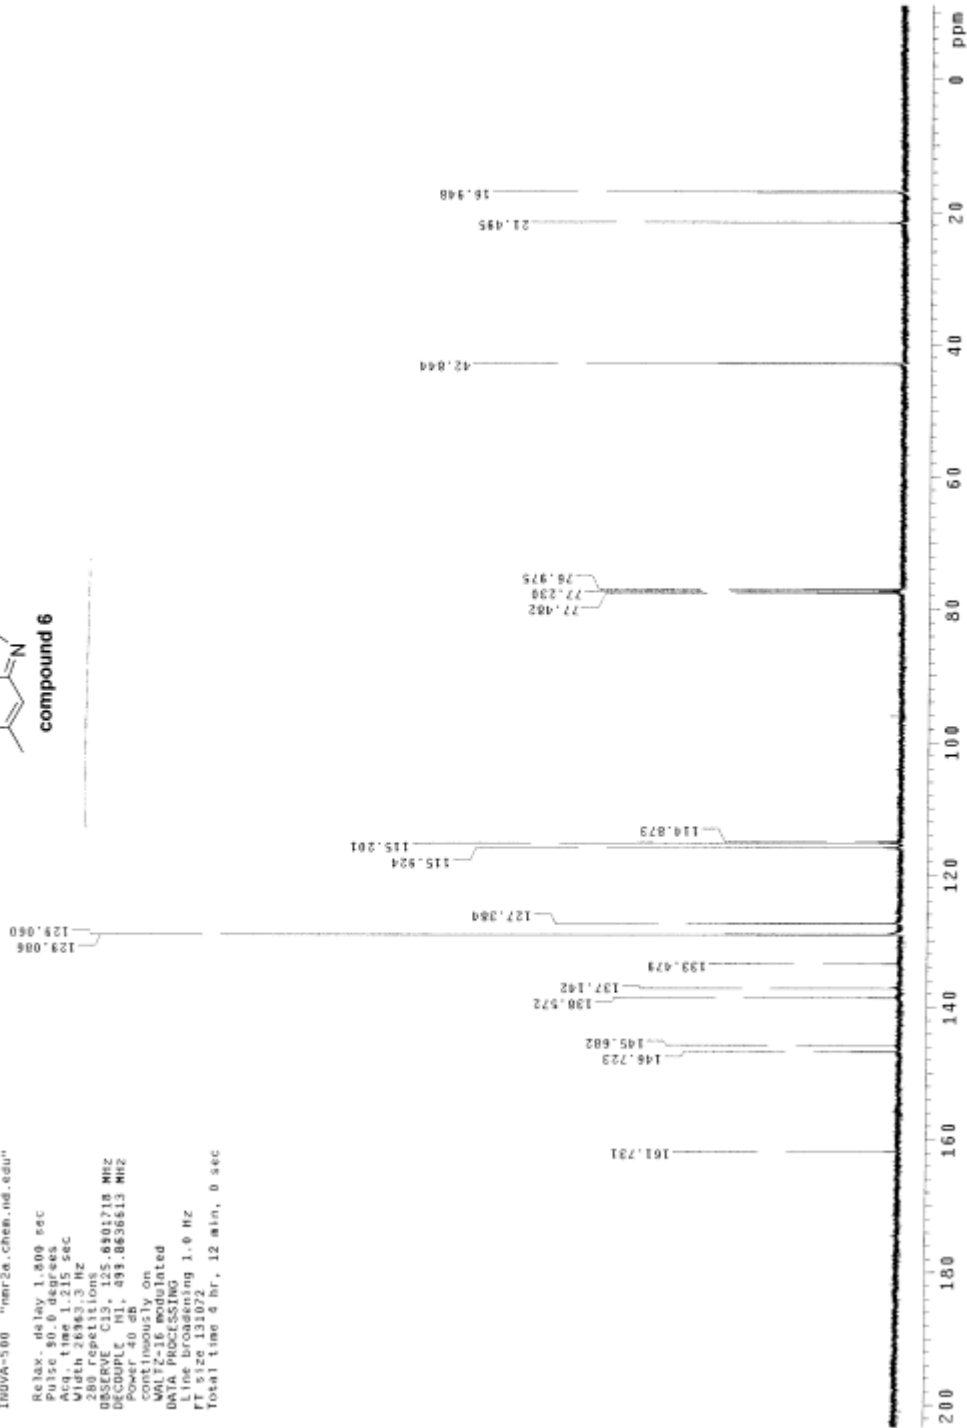

Supplement: ml200036r_si_001.pdf [file ml200036r_si_001.pdf]
